# Supplementary material for: Decarboxylation and simultaneous reduction of silver(i) β-ketocarboxylates with three types of coordinations
Source: Royal Society of Chemistry journal article supplement (doi:10.1039/c5dt00773a), 2015-01-01

# Compound 7c

C:\GCMSSolution\Data\nakatani.lab\zhou\hatamura\_121217\_2.QGD

クロマトグラム hatamura\_121217\_2 C:\GCMSSolution\Data\nakatani.lab\zhou\hatamura\_121217\_2.QGD

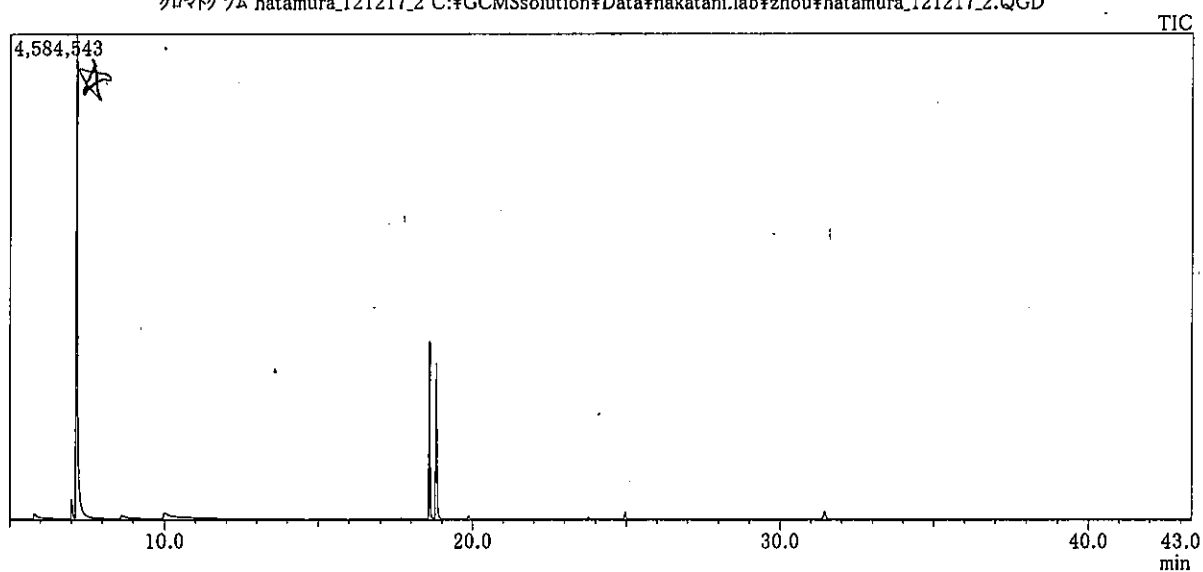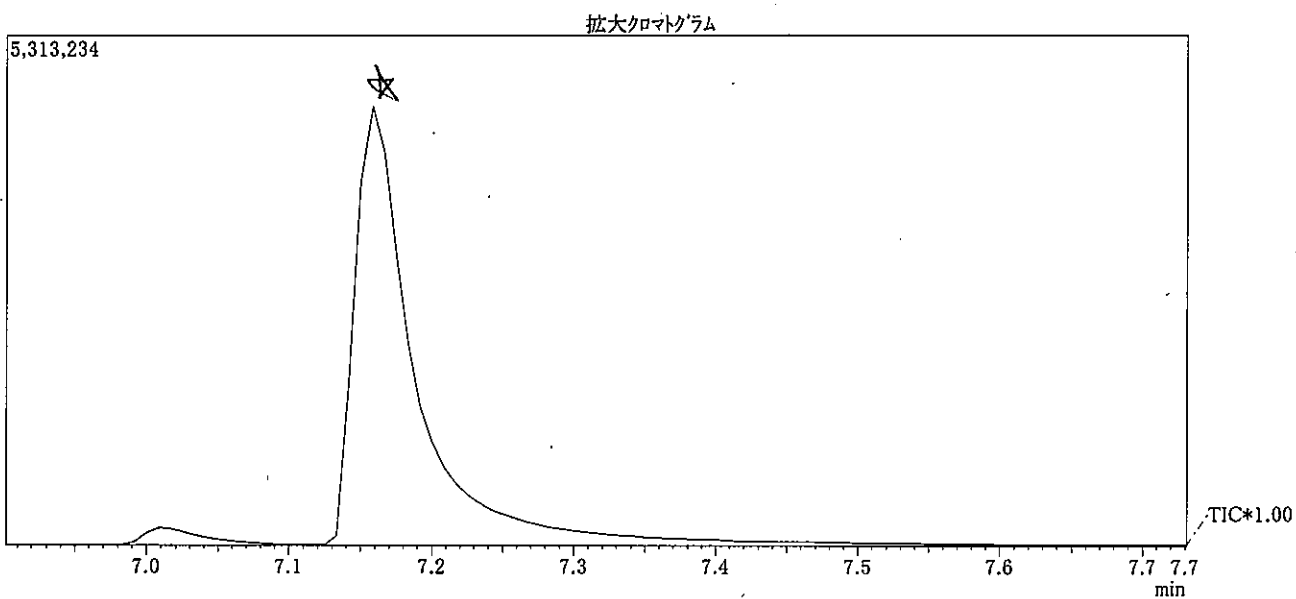

スペクトル

#1 保持時間:7.158(スキャン#:260)  
ピーク数:40 ベースピーク:43.05(1941995)  
スペクトル:シングル 7.158(260)  
バックグラウンド:平均 7.367-7.500(285-301)

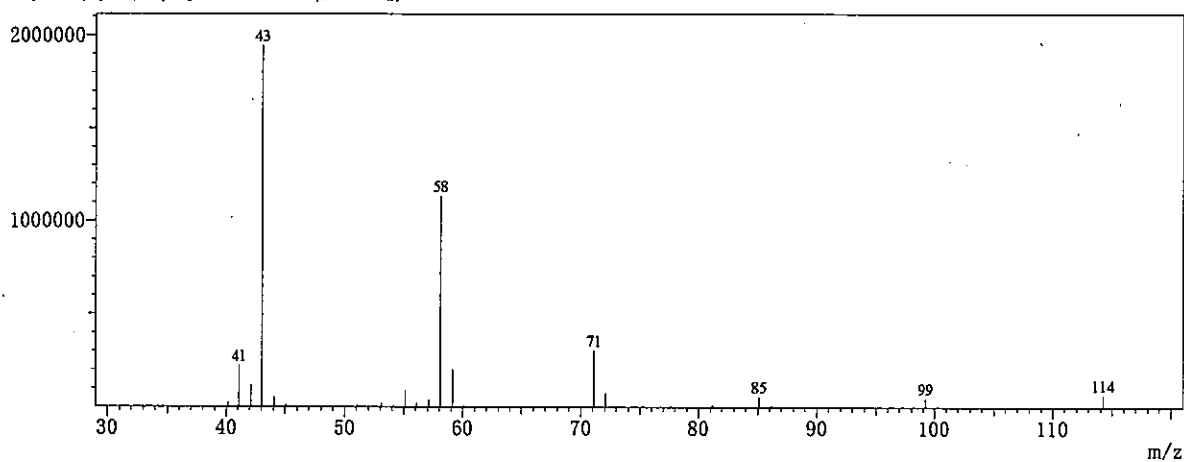

C:\GCMSsolution\Data\nakatani.lab\zhou\hatamura\_121217\_2.QGD

クロマトグラム hatamura\_121217\_2 C:\GCMSsolution\Data\nakatani.lab\zhou\hatamura\_121217\_2.QGD

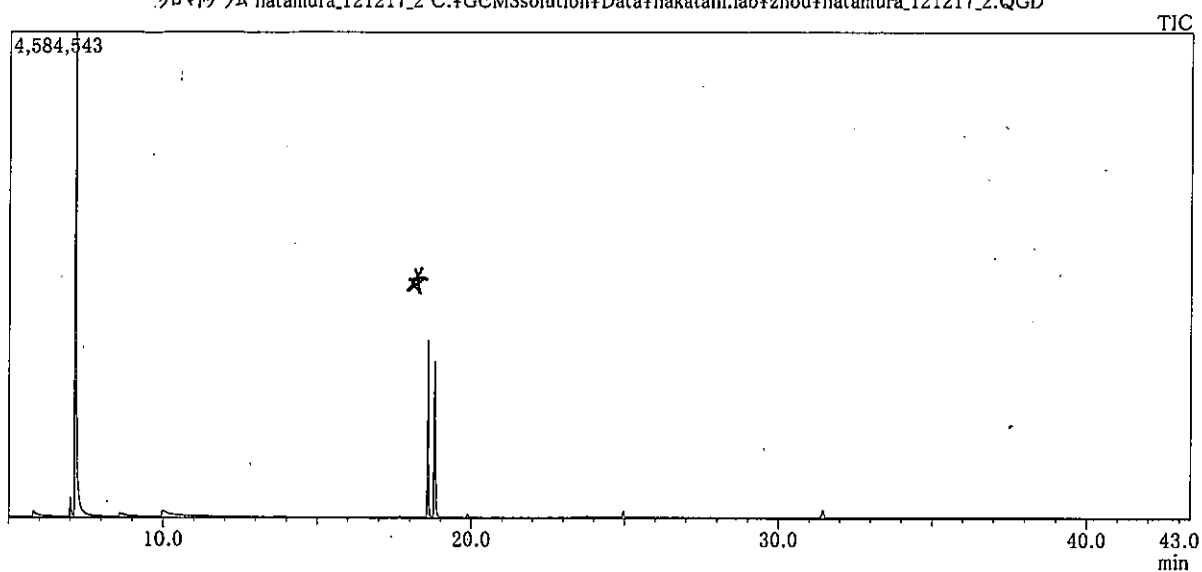

拡大クロマトグラム

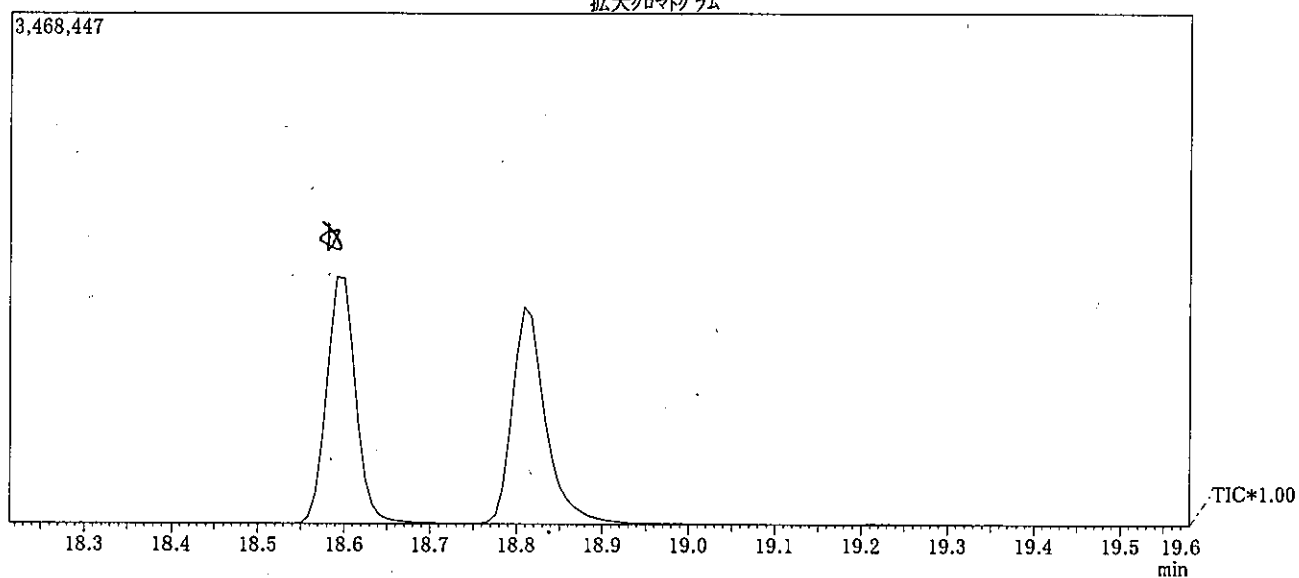

スペクトル

#1 保持時間:18.592(スキャン#:1632)  
ピーク数:79 ベースピーク:43.05(447145)  
スペクトル:シングル 18.592(1632)  
バックグラウンド:なし

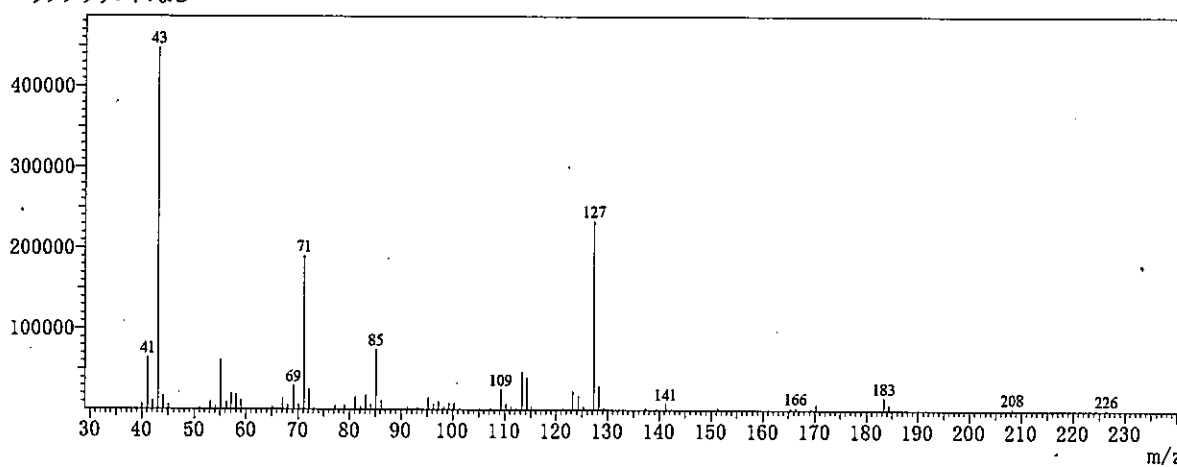

C:\GCMSsolution\Data\nakatani.lab\zhou\hatamura\_121217\_2.QGD

クロマトグラム hatamura\_121217\_2 C:\GCMSsolution\Data\nakatani.lab\zhou\hatamura\_121217\_2.QGD

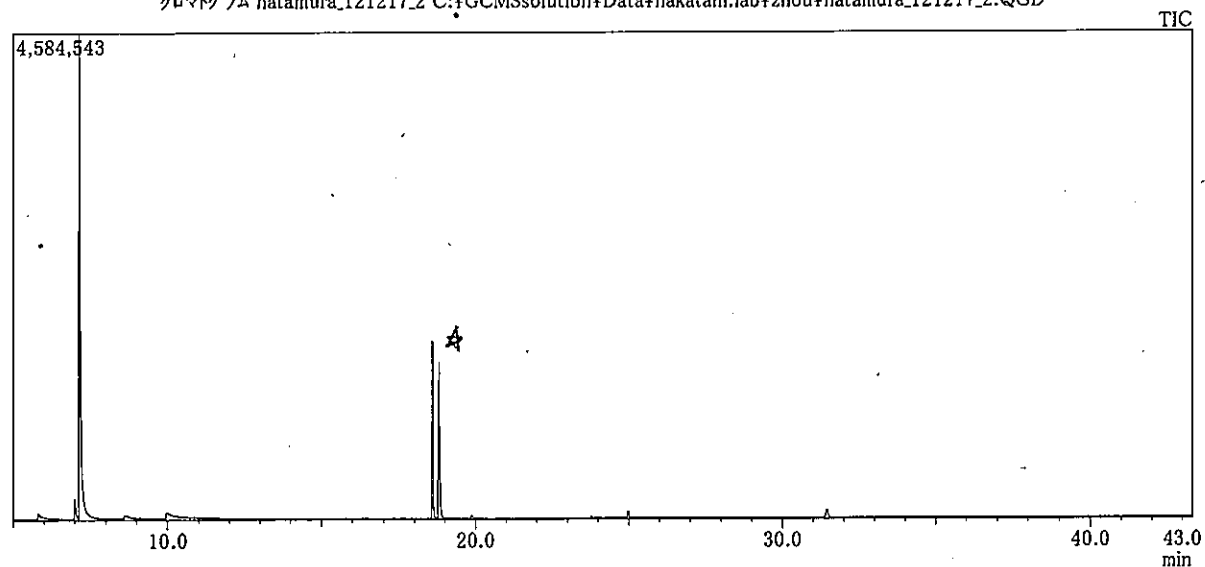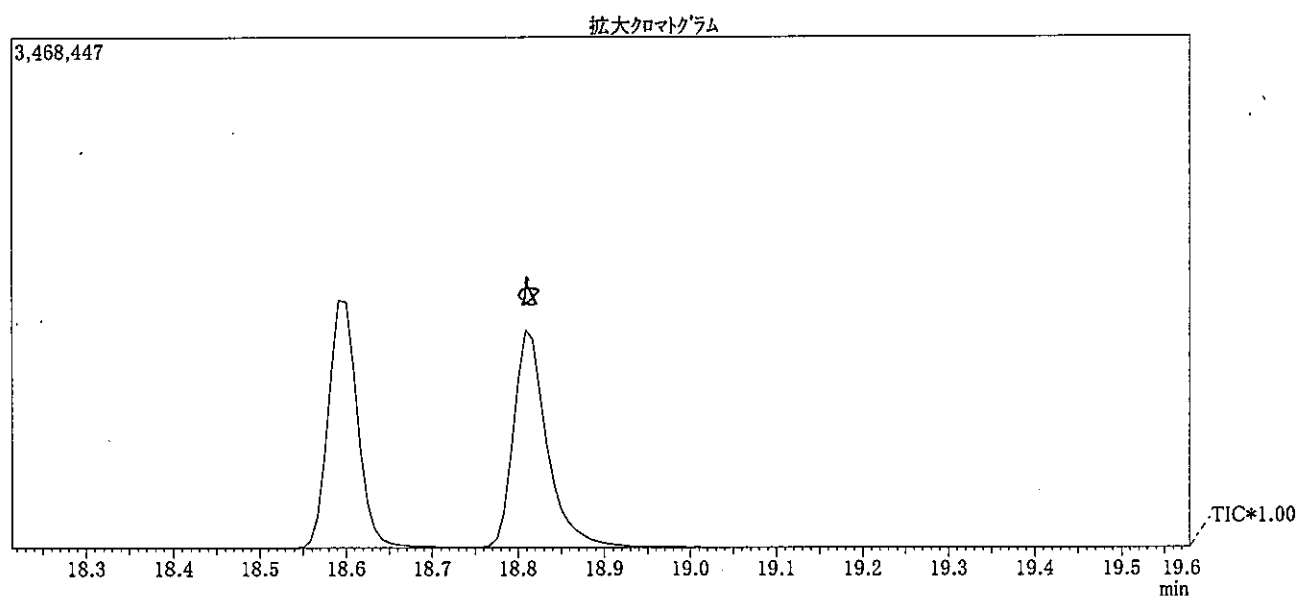

スペクトル

#1 保持時間:18.808(スキャン#:1658)  
ピーク数:71 ベースピーク:43.05(400312)  
スペクトル:シングル 18.808(1658)  
バックグラウンド:なし

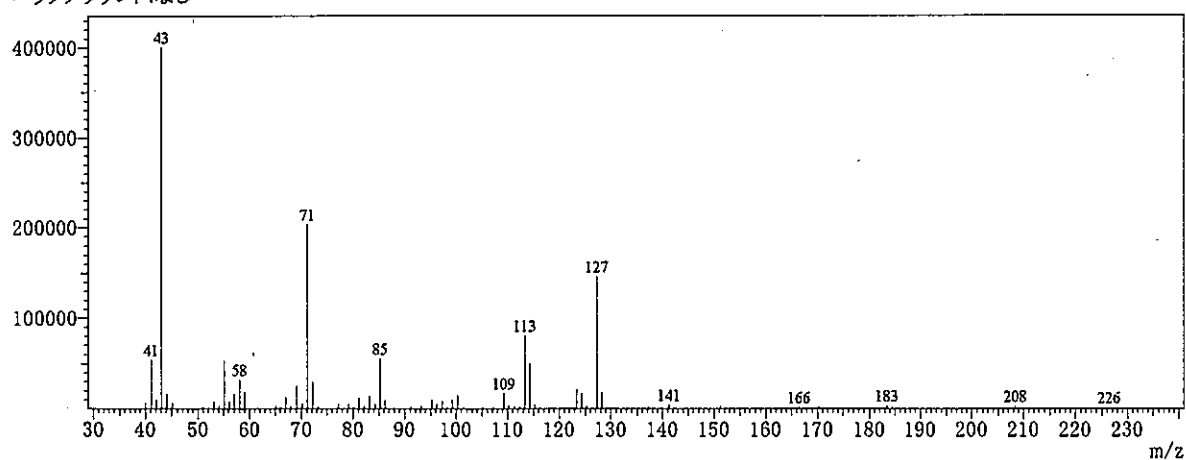

C:\GCMSsolution\Data\nakatani.lab\zhou\110516hatamural.QGD

クロマトグラム 1100516hatamural C:\GCMSsolution\Data\nakatani.lab\zhou\110516hatamural.QGD

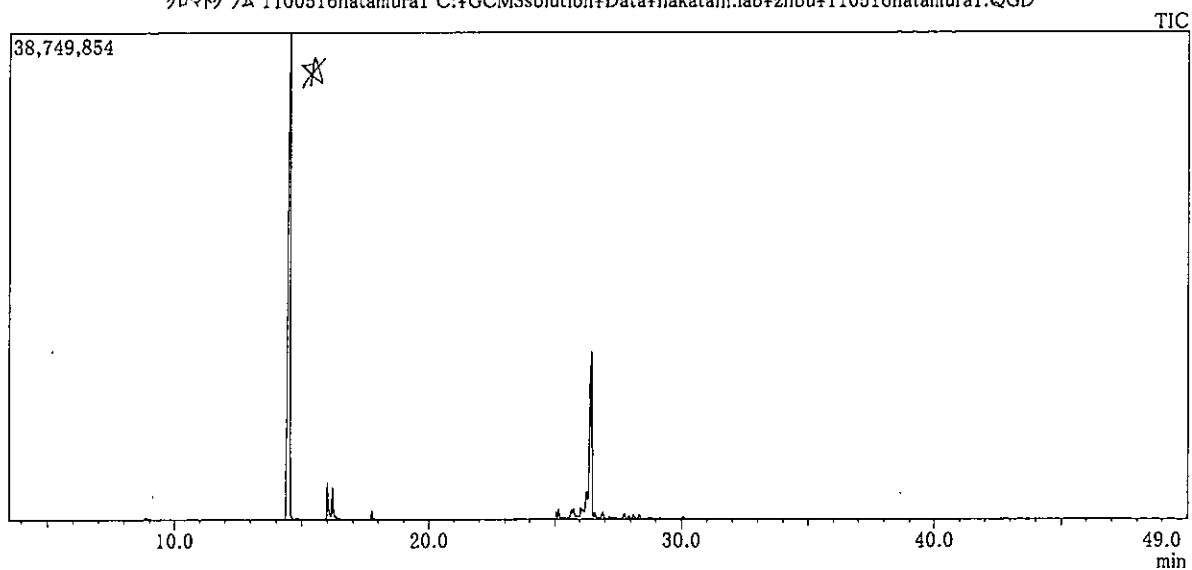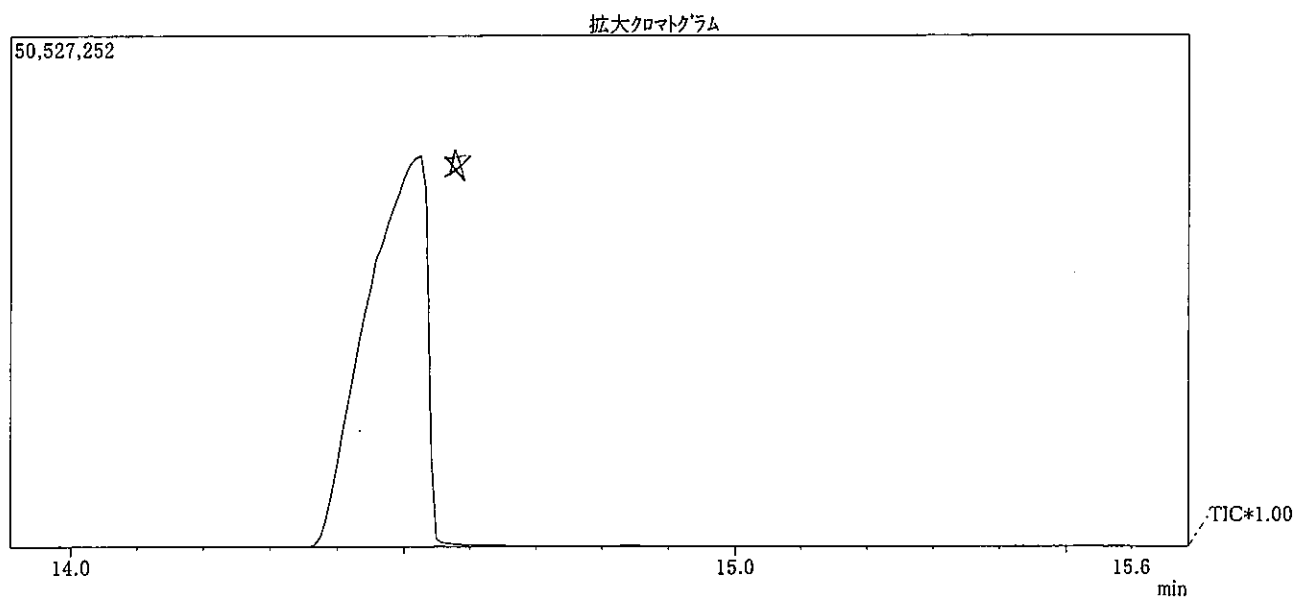

スペクトル

#1 保持時間:14.517(スキャン#:1323)  
ピーク数:27 ベースピーク:43.05(7106901)  
スペクトル:シングル 14.517(1323)  
バックグラウンド:なし

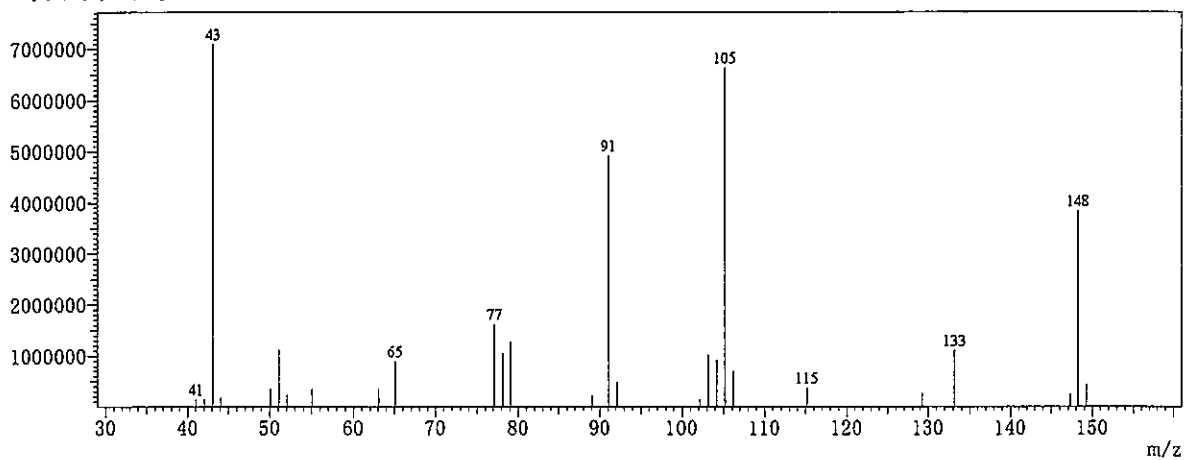

C:\GCMSsolution\Data\nakatani.lab\zhou\110516hatamural.QGD

クロマトグラム 1100516hatamural C:\GCMSsolution\Data\nakatani.lab\zhou\110516hatamural.QGD

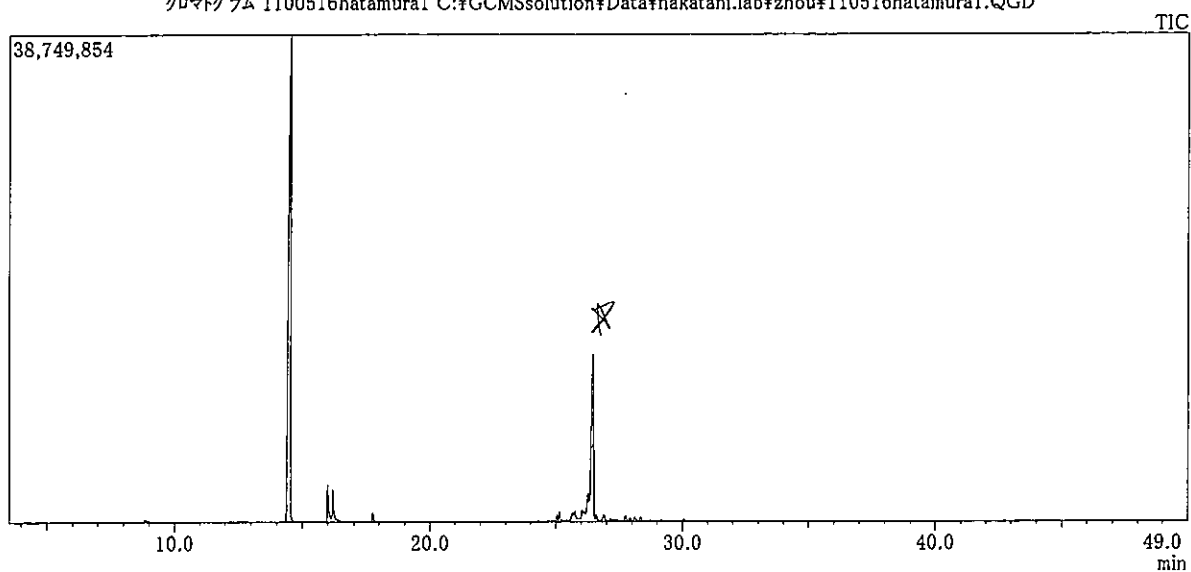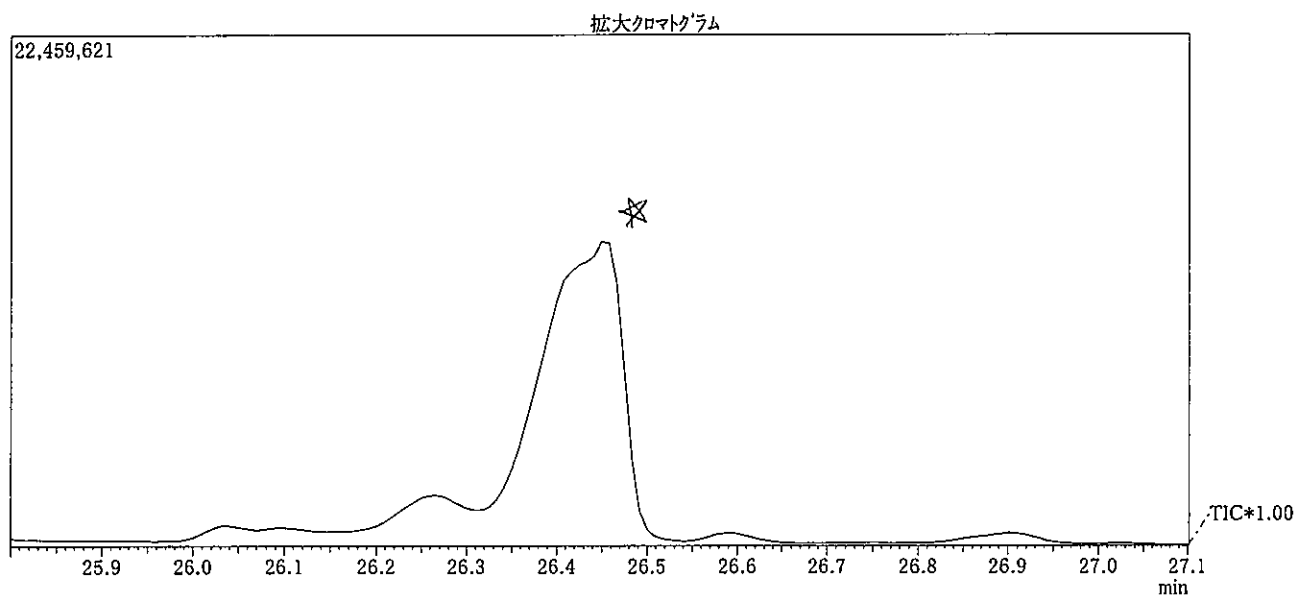

スペクトル

#1 保持時間:26.450(スキャン#:2755)  
ピーク数:24 ベースピーク:147.25(3310777)  
スペクトル:シングル 26.450(2755)  
バックグラウンド:なし

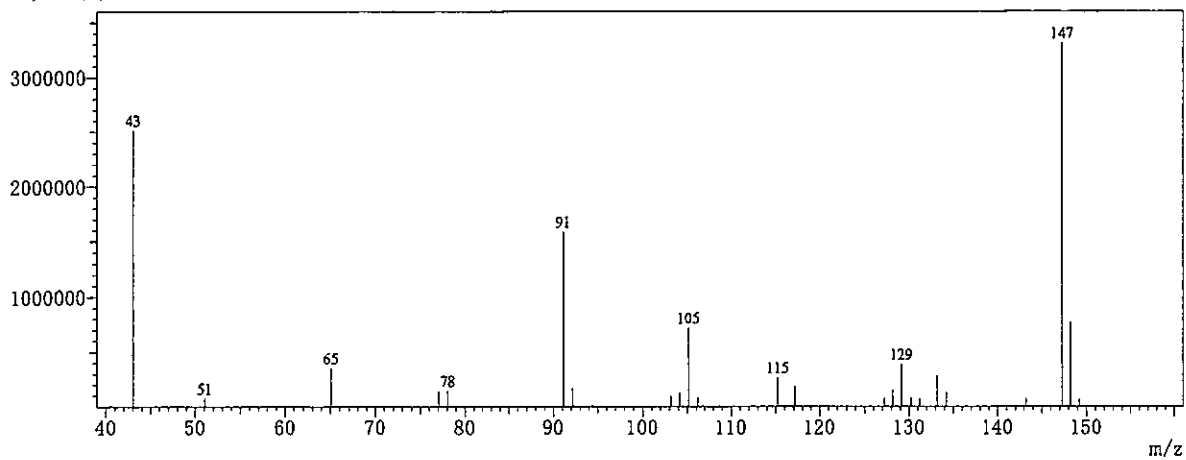

Supplement: c5dt00773a6.pdf [file c5dt00773a6.pdf]
