# Supplementary material for: Decarboxylation and simultaneous reduction of silver(i) β-ketocarboxylates with three types of coordinations
Source: Royal Society of Chemistry journal article supplement (doi:10.1039/c5dt00773a), 2015-01-01
Supplement: c5dt00773a8.pdf [file c5dt00773a8.pdf]

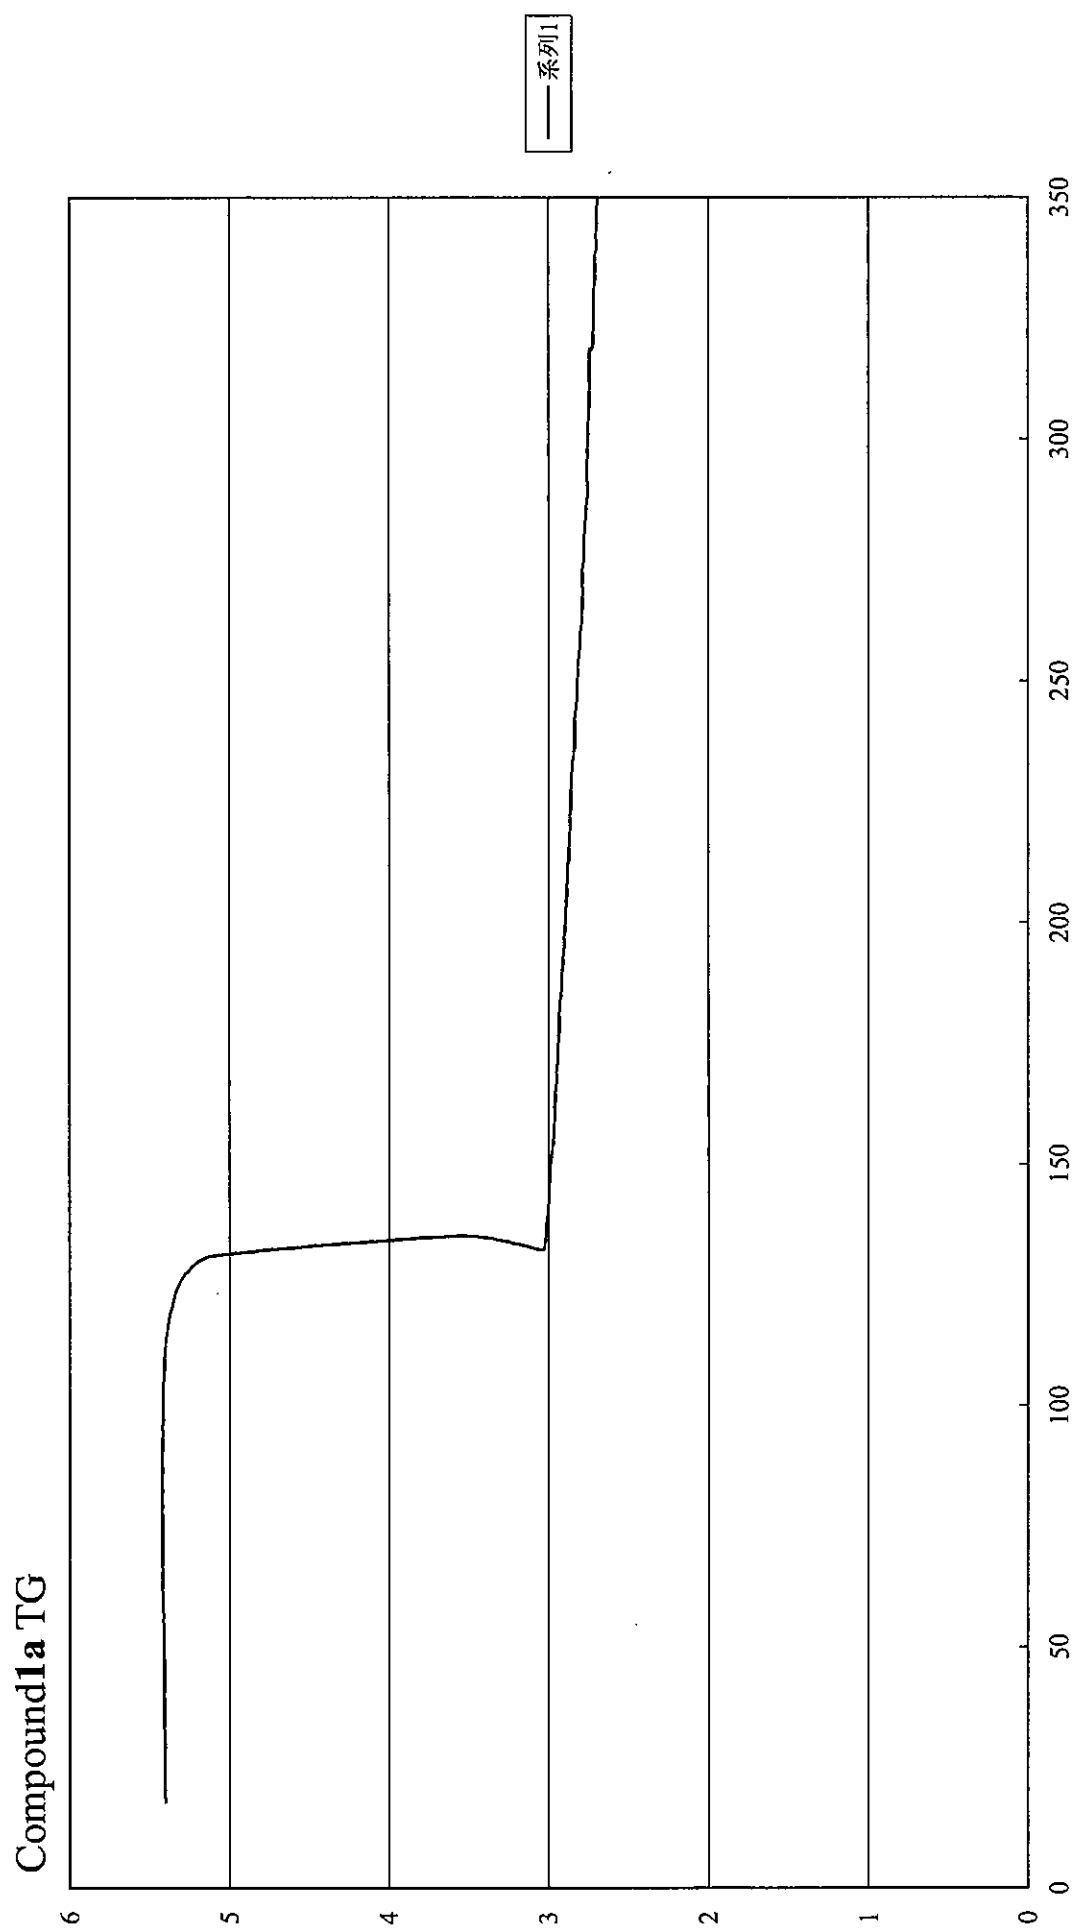

Compound2a TG

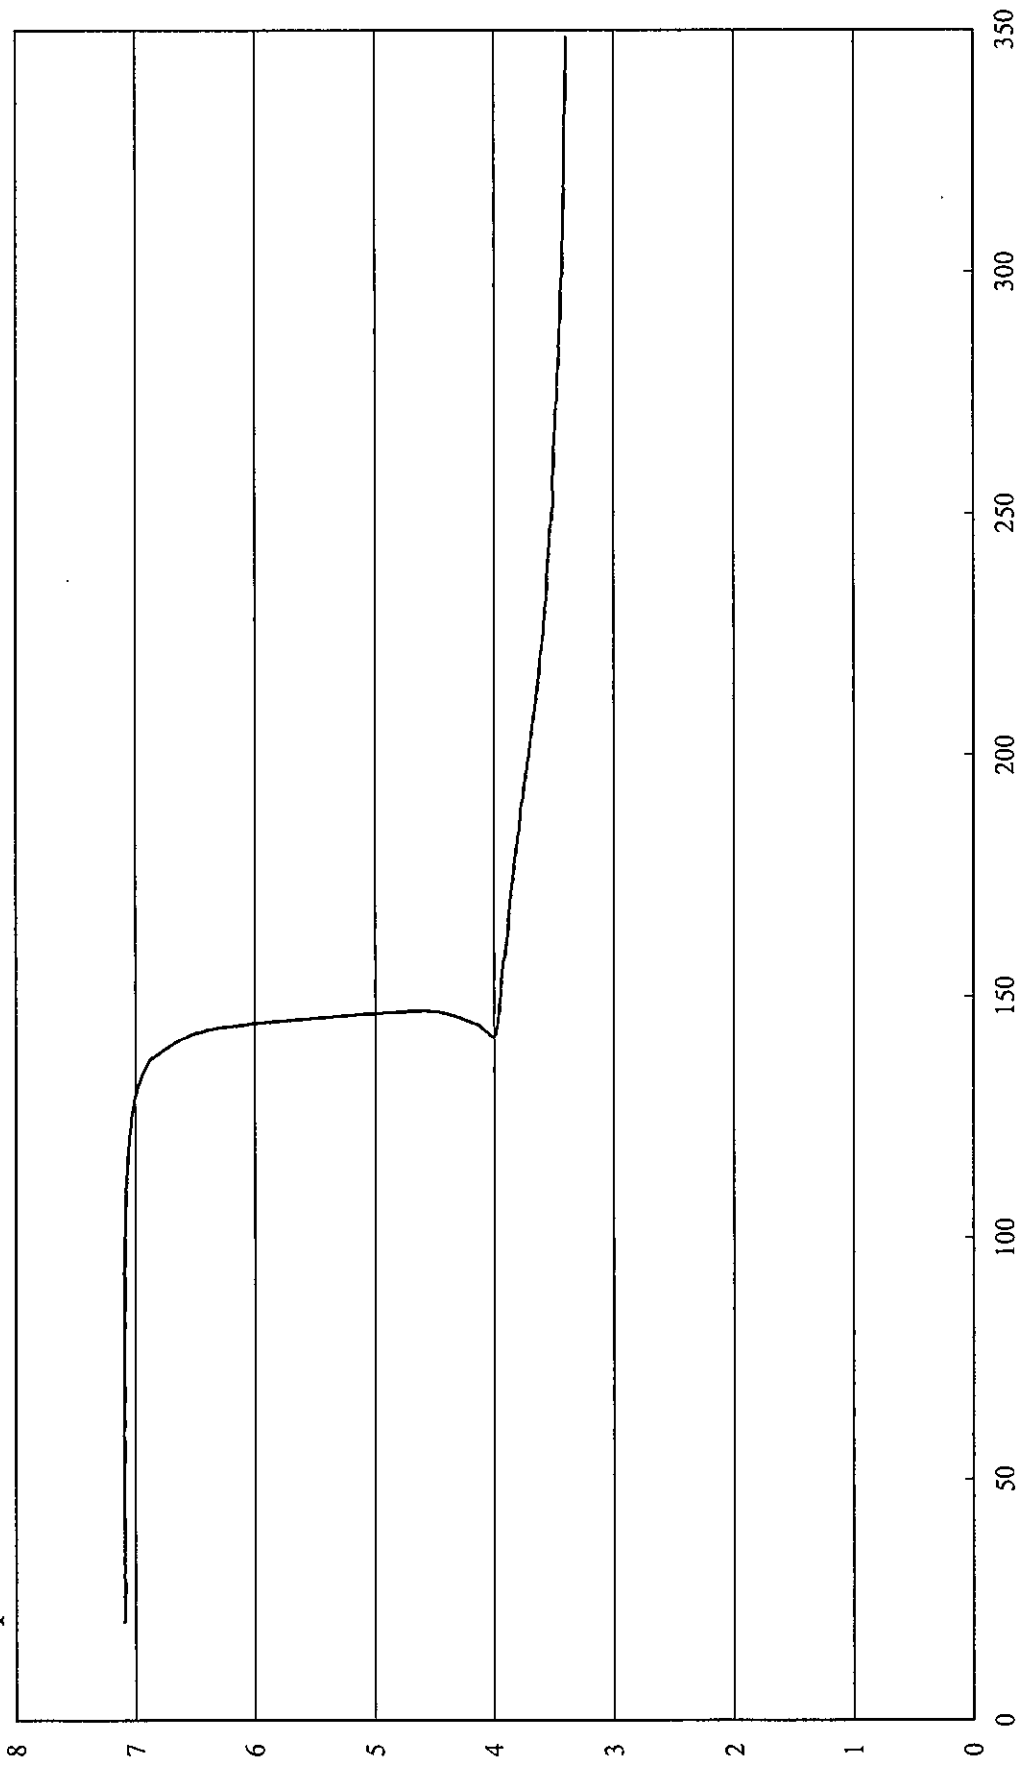

— 系列1

Compound3a TG

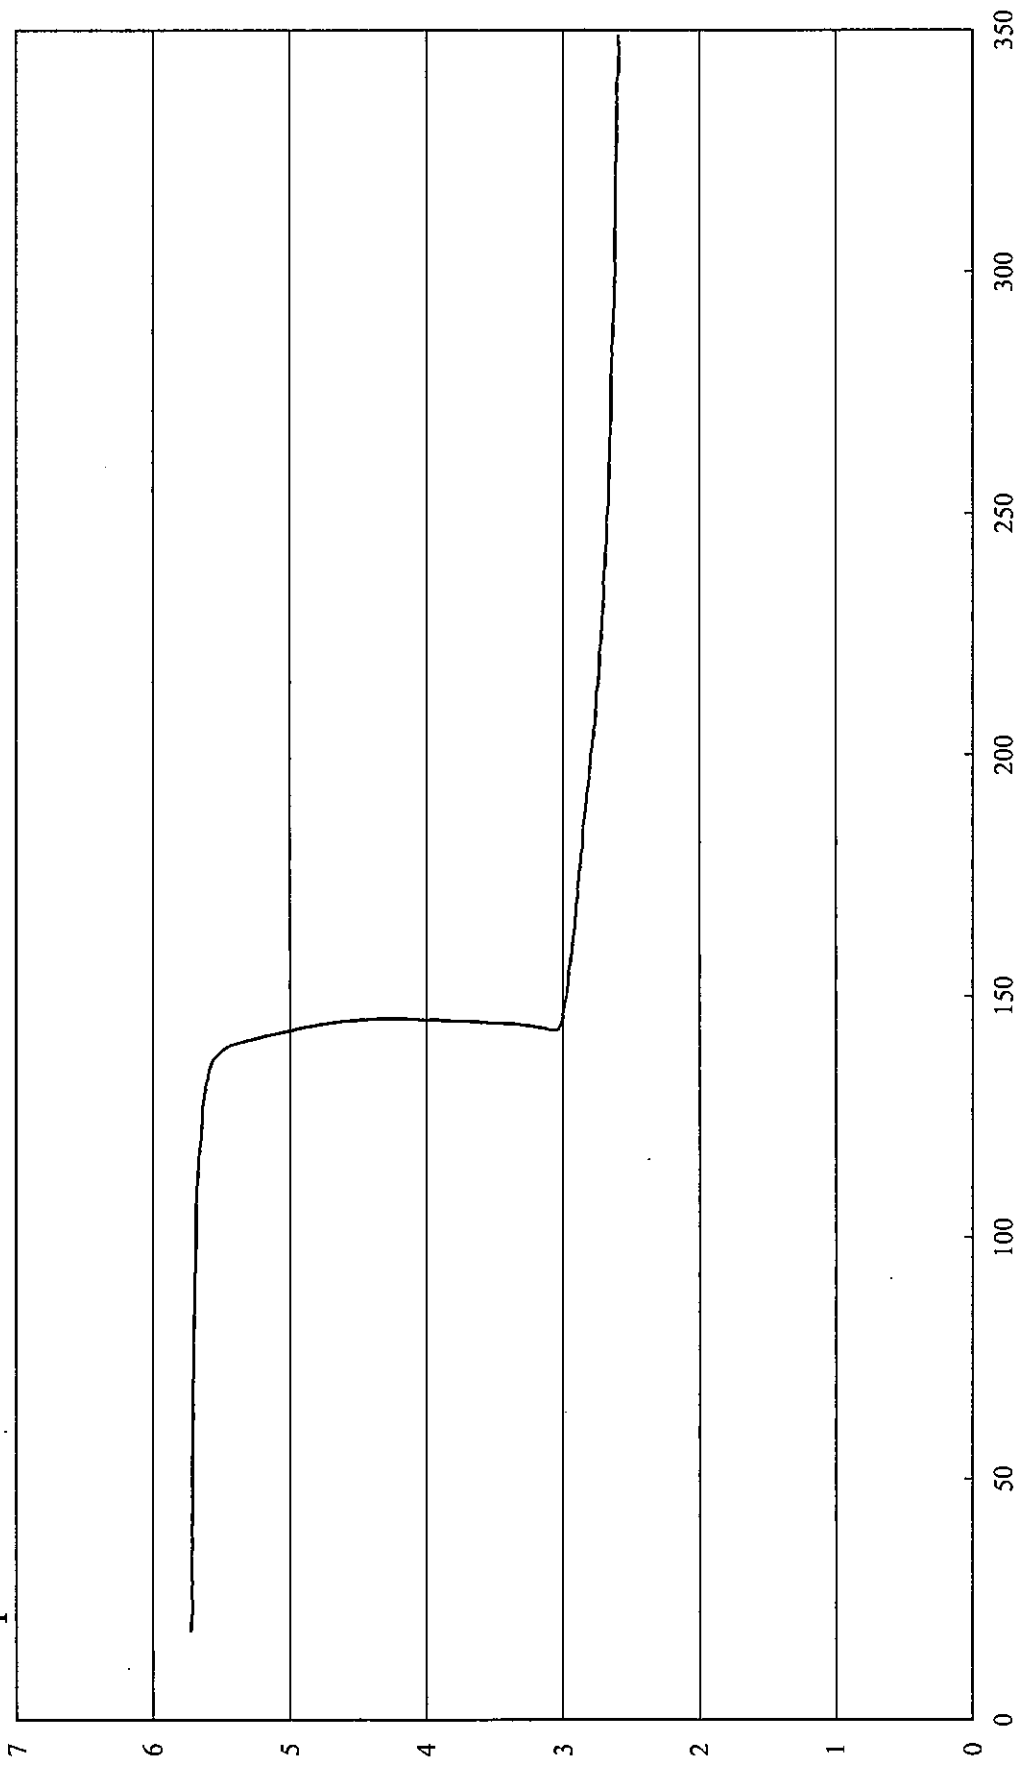

— 系列1

Compound4a TG

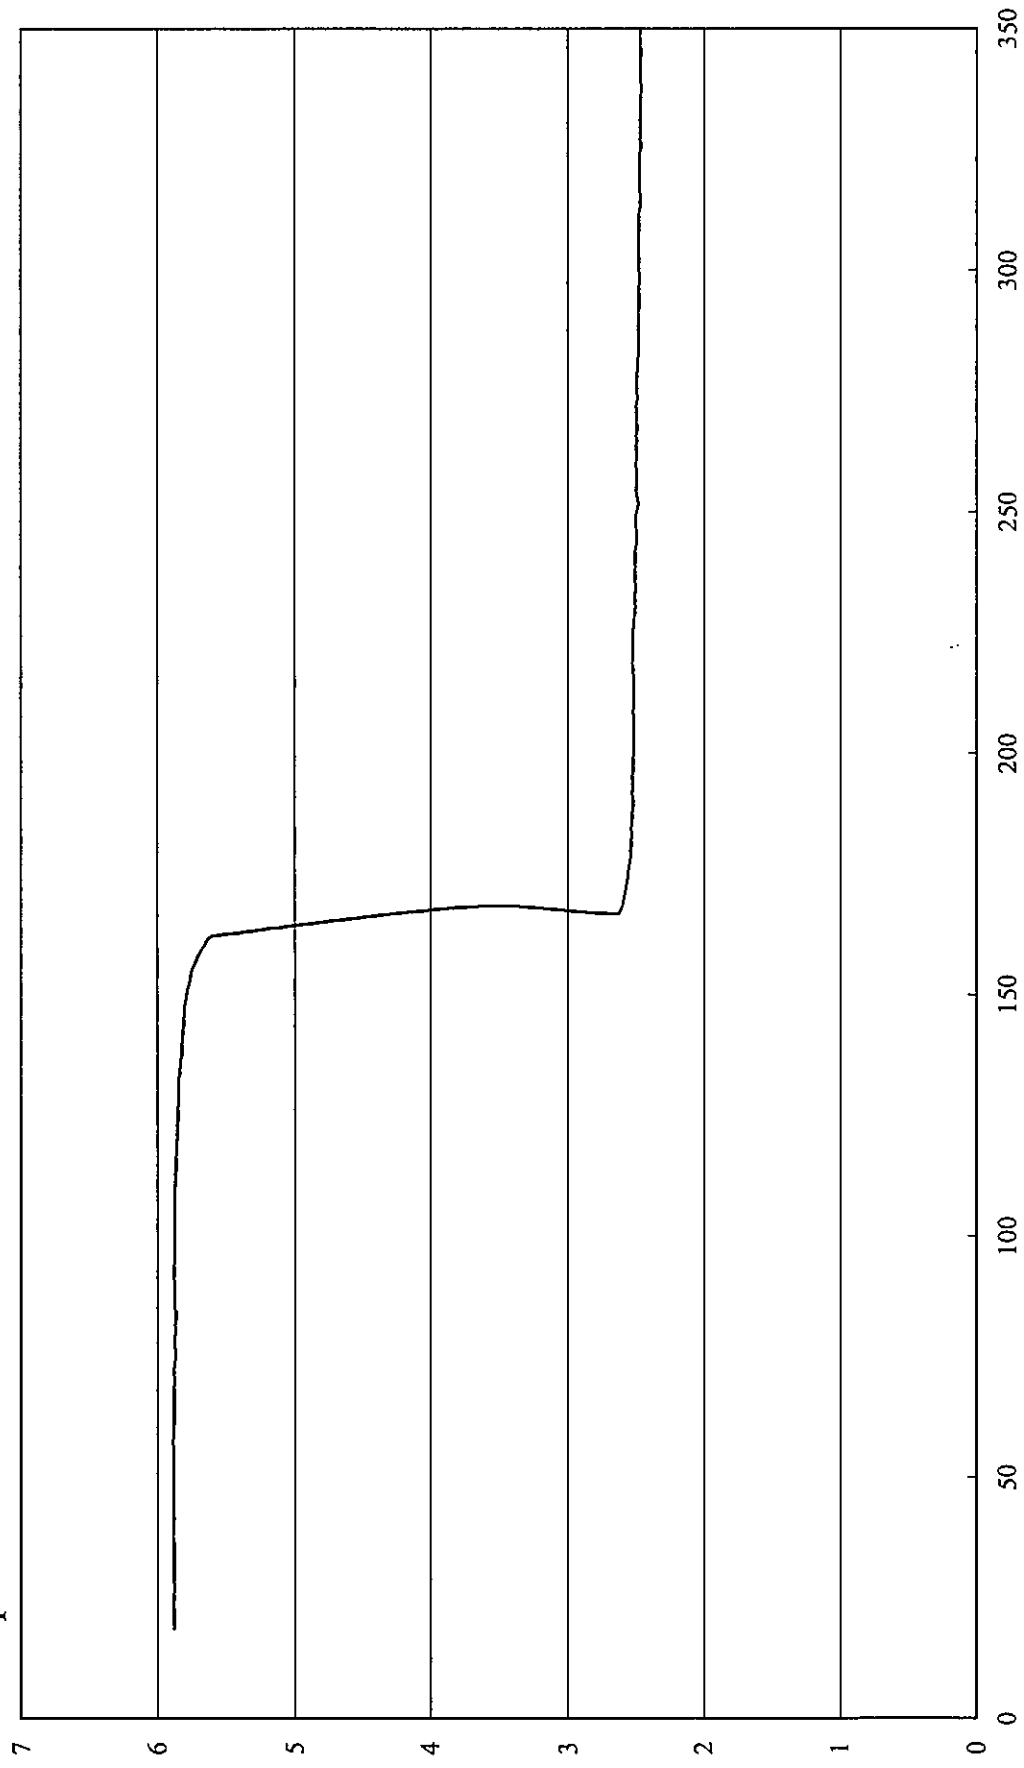

— 系列1

Compound5a TG

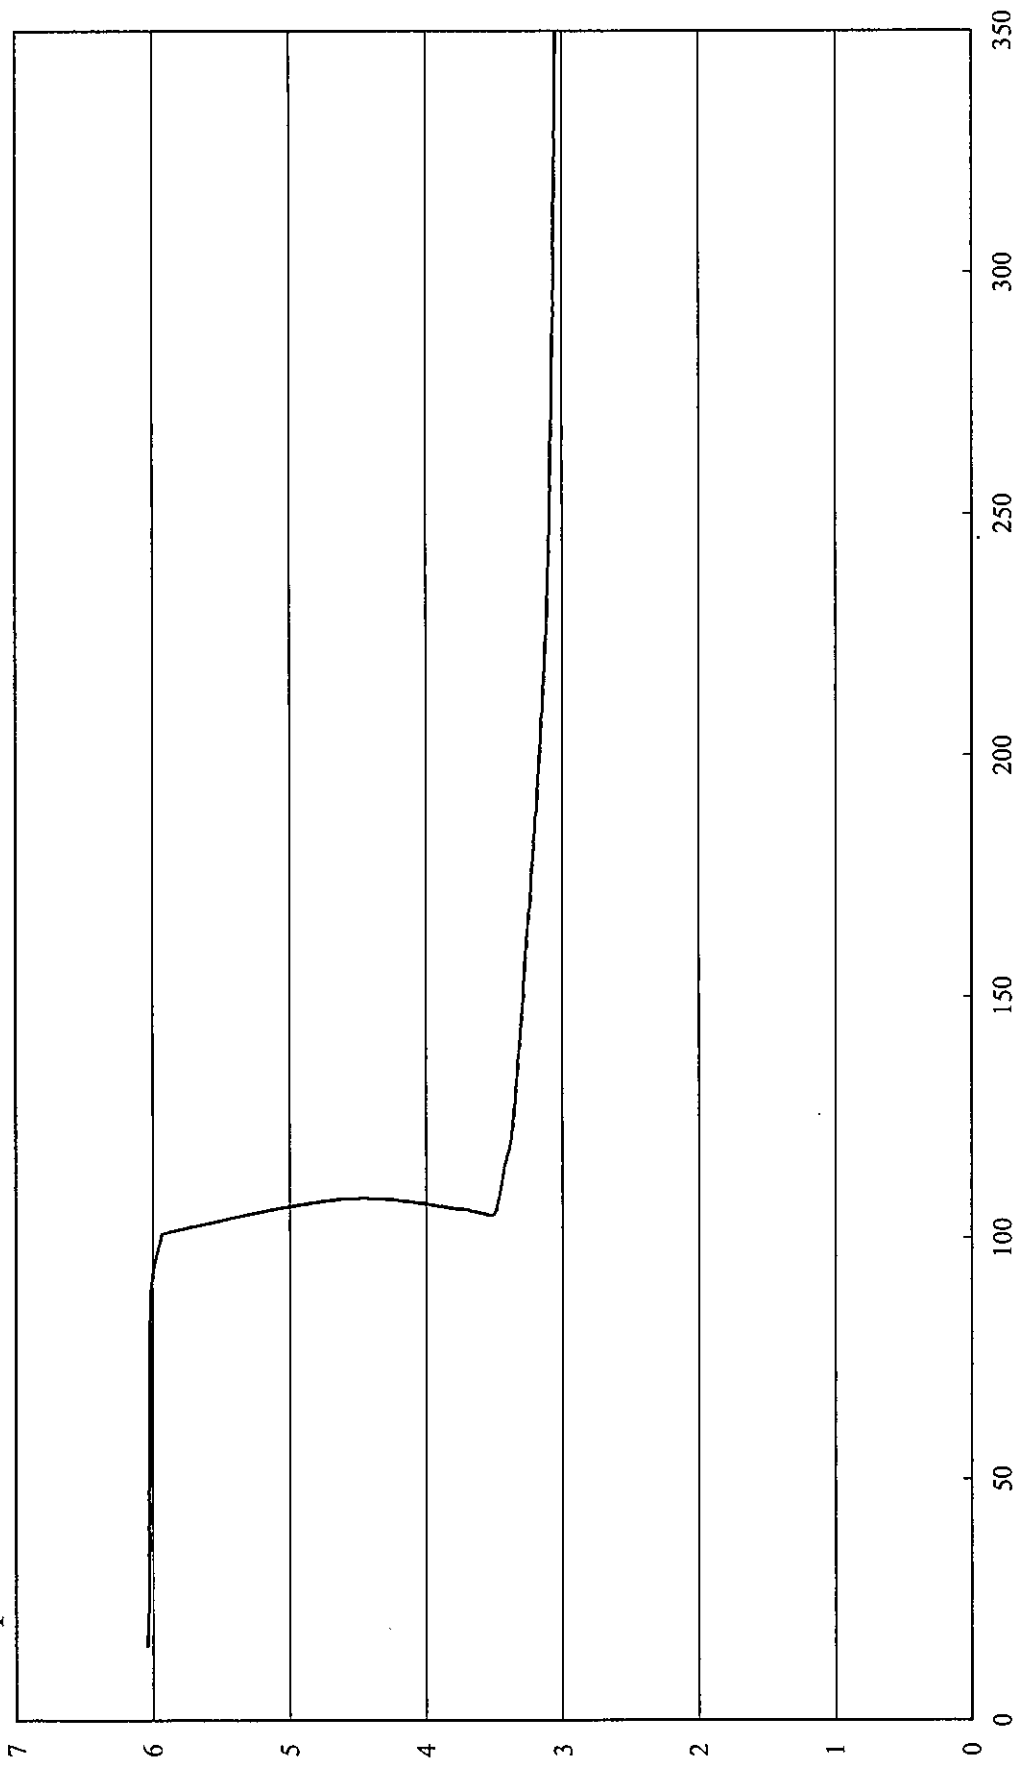

— 系列1

Compound6a TG

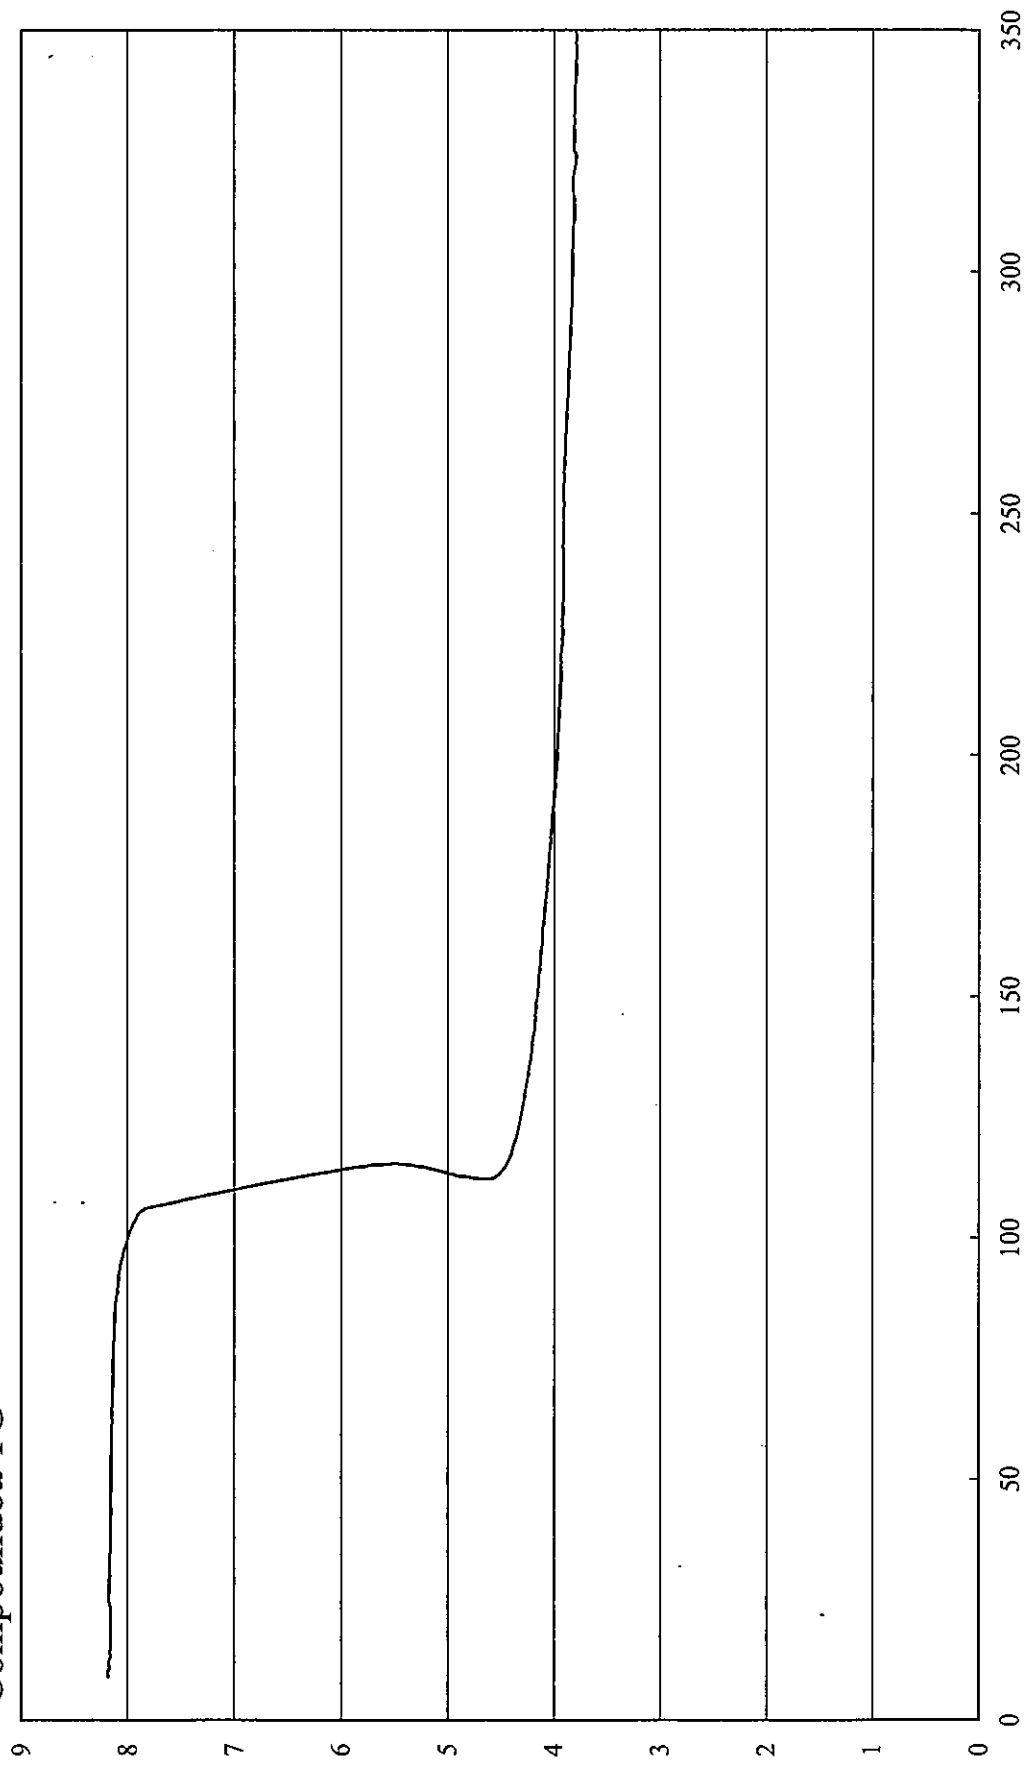

— 系列1

Compound7a TG

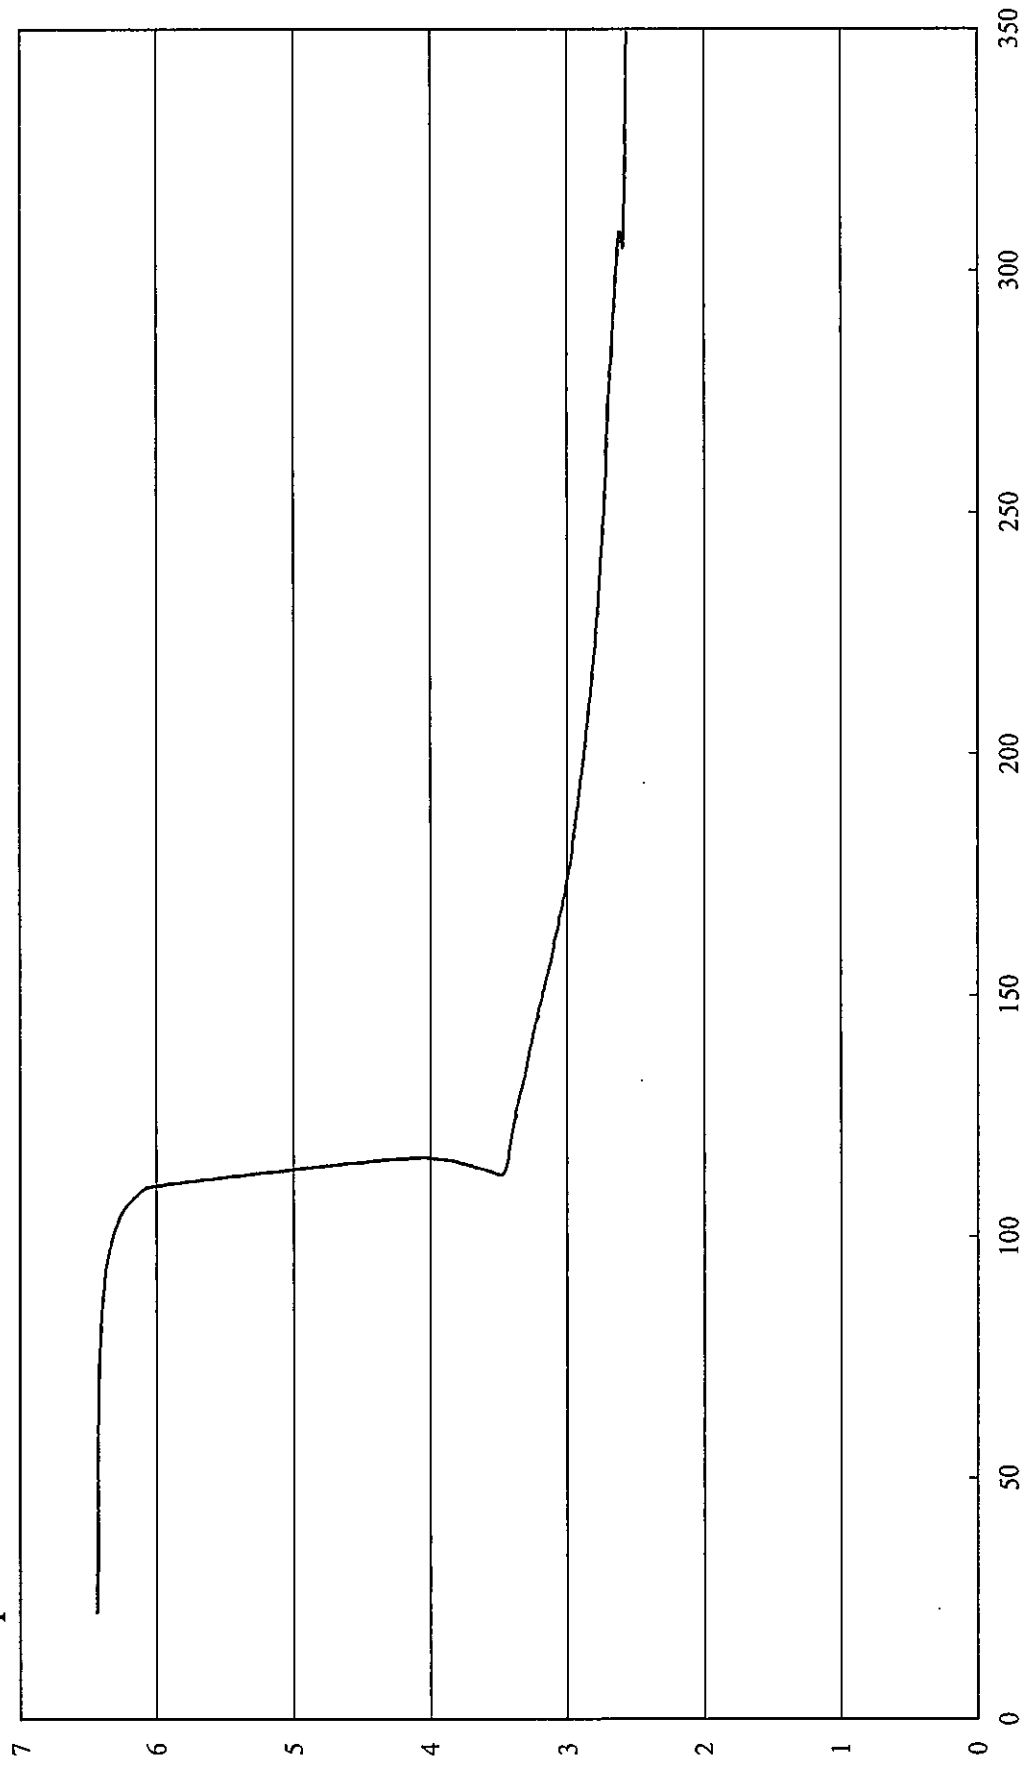

— 系列1

Compound8a TG

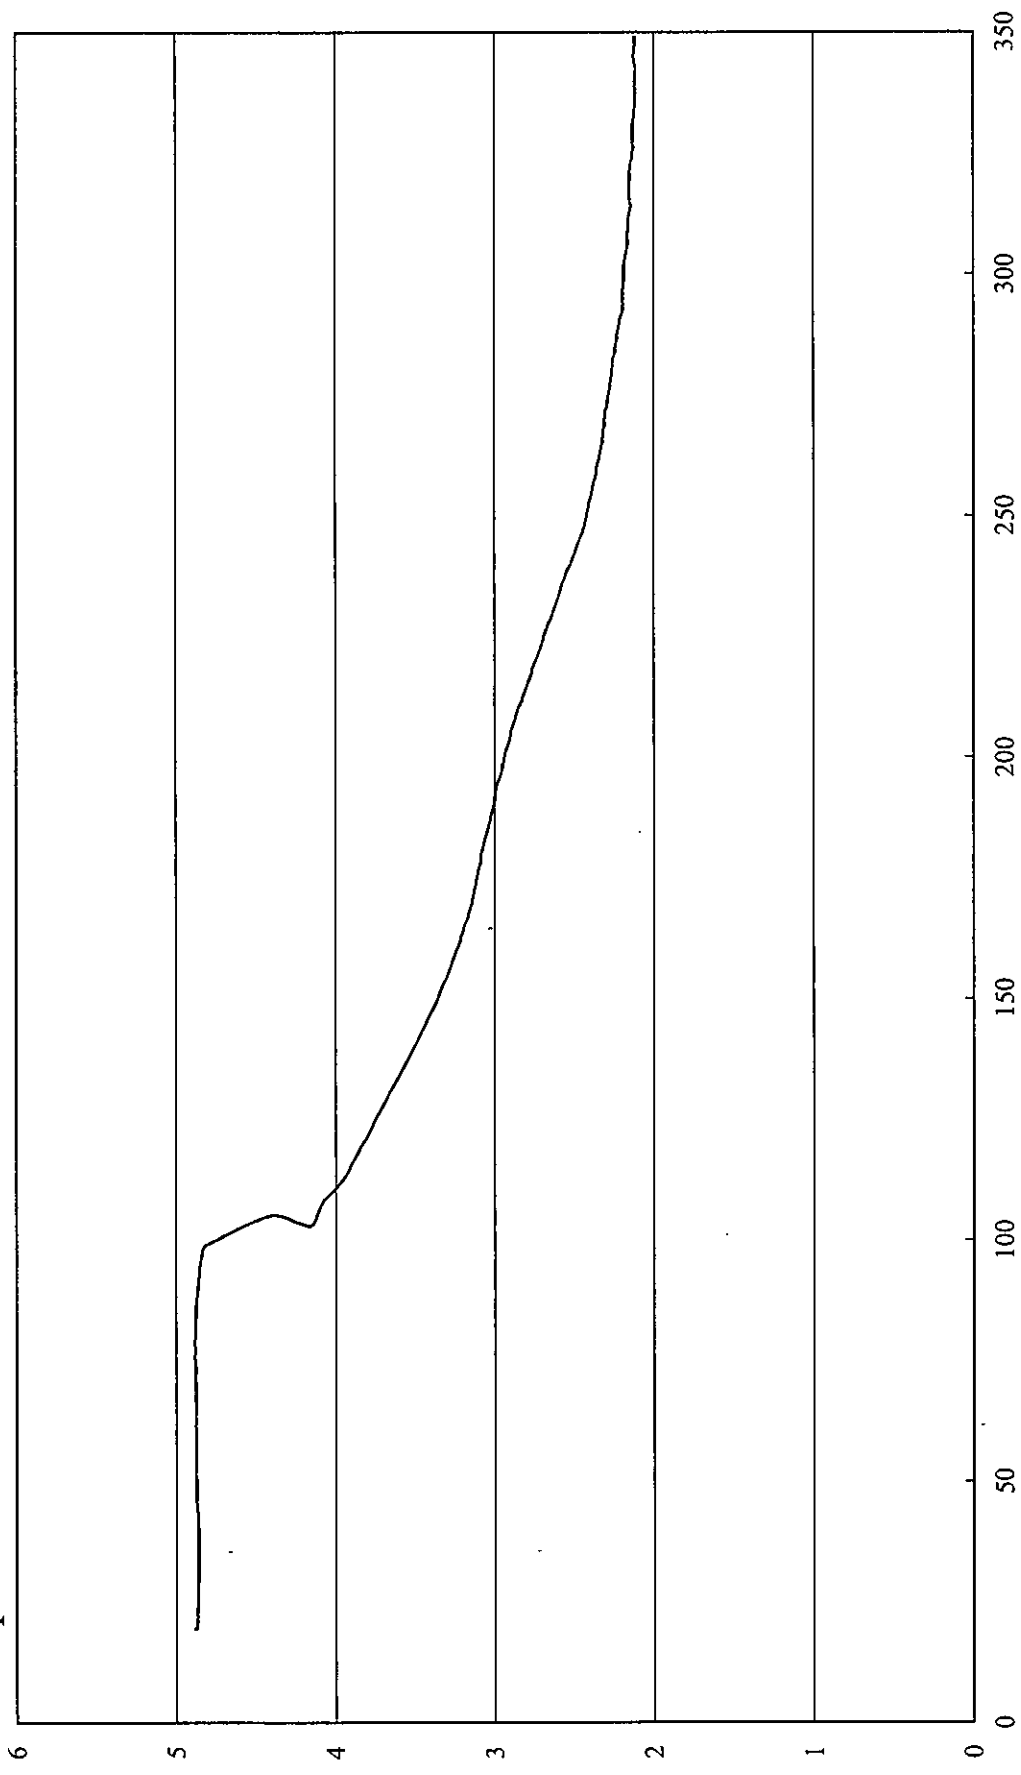

—系列1
